# Supplementary material for: Tam Kinase Receptor Inhibition-A Possible Therapeutic Intervention to Prevent Breast Cancer Recurrence After Therapy
Source: Research Square preprint supplement (doi:10.21203/rs.3.rs-7385510/v1), 2025-10-07

**Western Blotting Membrane Blots**

The blotting membrane was stripped and re-incubated with antibodies.

**Left to Right** (MCF-7 Control, LDC 1267 inhibitor concentration 1.62uM and 0.81uM, MDA-MB-231 Control, LDC1267 inhibitor Concentration 1.62uM, 0.81uM)

Dissection of Intrinsic Apoptotic pathway was being carried out using the below mentioned antibodies


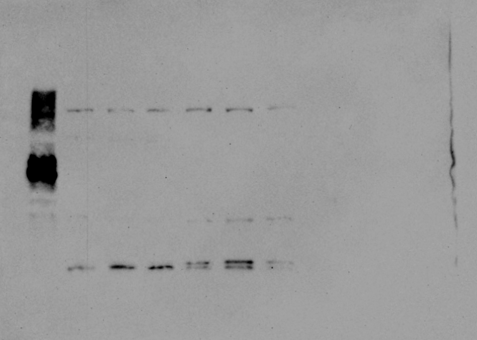

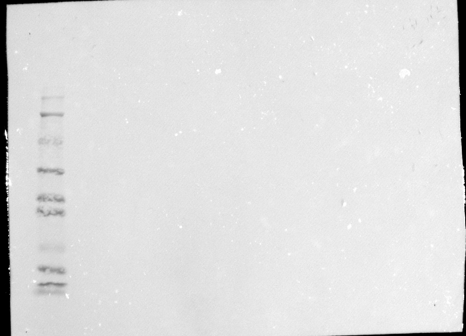

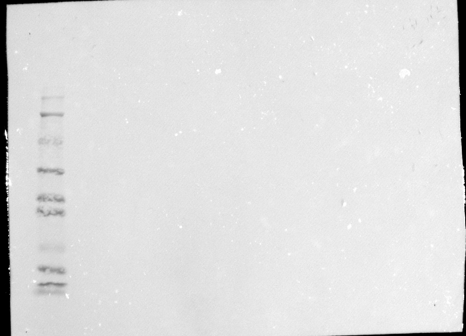

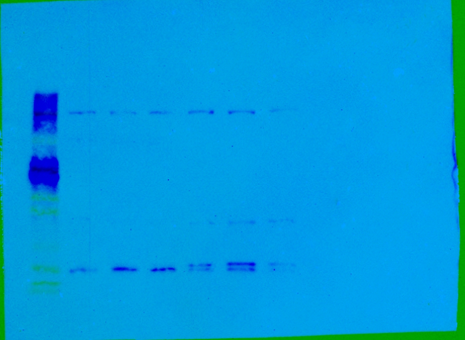


Cleaved Caspase 3

Cleaved Caspase 3

Composite Figure

250kD

150kD

100kD

75kD

50kD

37kD

25kD

20kD

15kD

10kD

250kD

150kD

100kD

75kD

50kD

37kD

25kD

20kD

15kD

10kD

250kD

150kD

100kD

75kD

50kD

37kD

25kD

20kD

15kD

10kD

250kD

150kD

100kD

75kD

50kD

37kD

25kD

20kD

15kD

10kD


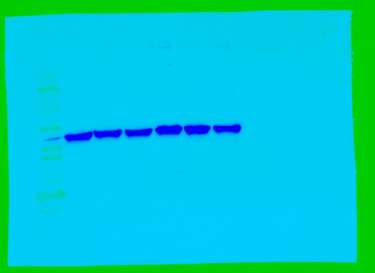

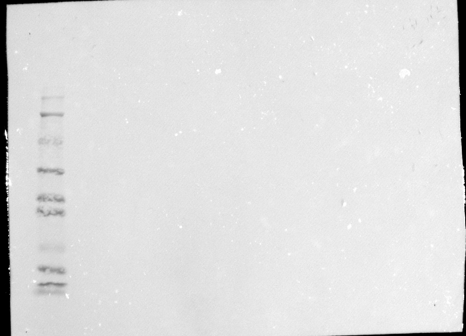

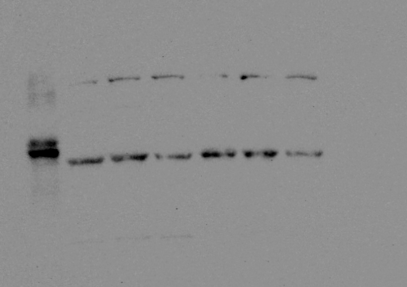

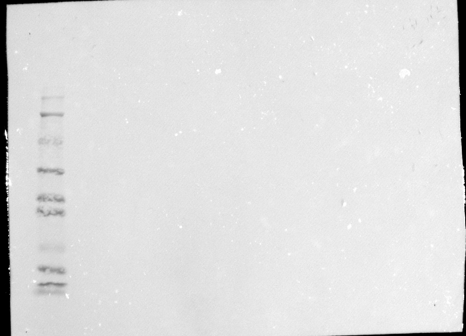

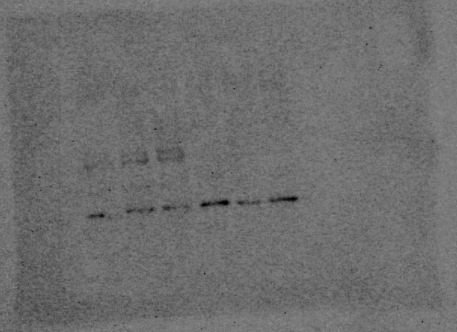

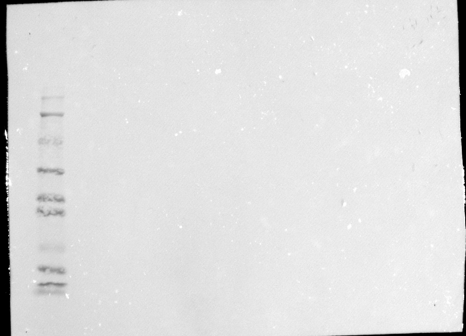


B-actin

Bax

BCl2

250kD

150kD

100kD

75kD

50kD

37kD

25kD

20kD

15kD

10kD

250kD

150kD

100kD

75kD

50kD

37kD

25kD

20kD

15kD

10kD

250kD

150kD

100kD

75kD

50kD

37kD

25kD

20kD

15kD

10kD

250kD

150kD

100kD

75kD

50kD

37kD

25kD

20kD

15kD

10kD

250kD

150kD

100kD

75kD

50kD

37kD

25kD

20kD

15kD

10kD

250kD

150kD

100kD

75kD

50kD

37kD

25kD

20kD

15kD

10kD


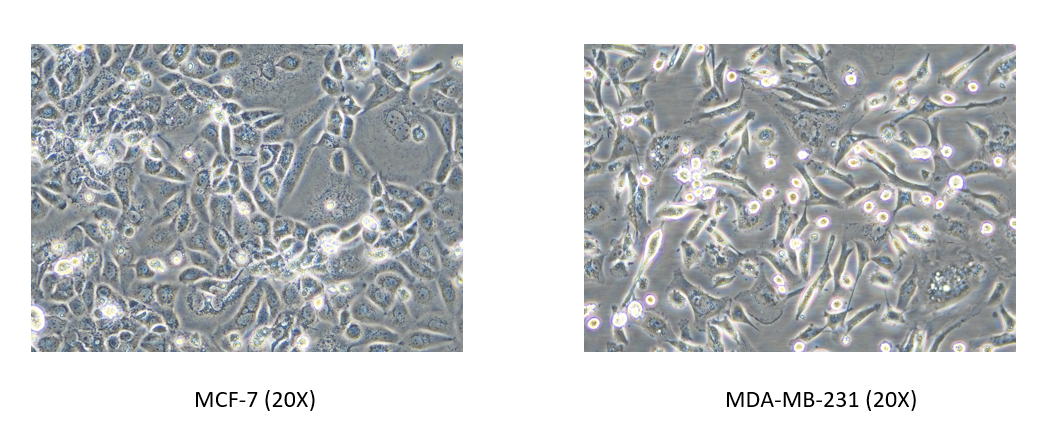

Supplement: Supplementary file 1 [file ca6a82188f4cd82475174d69.docx]
